# Supplementary material for: Changes in productivity and intermediate circulation in the northern Indian Ocean since the last deglaciation: new insights from benthic foraminiferal Cd ∕ Ca records and benthic assemblage analyses
Source: Copernicus journal article supplement (doi:10.5194/cp-18-1757-2022), 2022-08-03
Supplement: Supplementary file 1 [file cp-18-1757-2022-supplement.zip]

Archive with 4 entries (4 files):
- Supporting-Information.pdf
- cp-18-1757-2022-supplement-title-page.pdf
- table S1- elemental ratios data from MD77-191 and MD77-176.xlsx
- Table S2-major species quantities-MD77-191.xlsx
