# Supplementary material for: Changes in productivity and intermediate circulation in the northern Indian Ocean since the last deglaciation: new insights from benthic foraminiferal Cd ∕ Ca records and benthic assemblage analyses
Source: Copernicus journal article supplement (doi:10.5194/cp-18-1757-2022), 2022-08-03
Supplement: Supplementary file 1 [file cp-18-1757-2022-supplement.zip › cp-18-1757-2022-supplement-title-page.pdf]

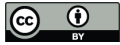

*Supplement of*

**Changes in productivity and intermediate circulation in the northern Indian Ocean since the last deglaciation: new insights from benthic foraminiferal Cd / Ca records and benthic assemblage analyses**

**Ruifang Ma et al.**

*Correspondence to:* Ruifang Ma (maruifang89@hotmail.com)

- cp-18-1757-2022-supplement-title-page.pdf
- Supporting-Information.pdf
- Table S2-major species quantities-MD77-191.xlsx
- table S1- elemental ratios data from MD77-191 and MD77-176.xlsx

The copyright of individual parts of the supplement might differ from the article licence.
