# Supplementary material for: Changes in productivity and intermediate circulation in the northern Indian Ocean since the last deglaciation: new insights from benthic foraminiferal Cd ∕ Ca records and benthic assemblage analyses
Source: Copernicus journal article supplement (doi:10.5194/cp-18-1757-2022), 2022-08-03
Supplement: Supplementary file 1 [file cp-18-1757-2022-supplement.zip › Supporting-Information.pdf]

## Contents of this file

Figures S1-S4

## Additional Supporting Information (Files uploaded separately)

Captions for Tables S1 to S2

## Introduction

**Figure S1.** a) – b) The Net primary productivity distribution in the Northern Indian Ocean during January and July, respectively. Maps based on MODIS chlorophyll-a, SST, PAR satellite data, using the standard vertically Generalized Production Model (VGPM) (Behrenfeld and Falkowski, 1997) as the standard algorithm.

**Fig. S2.** Down core variations of PC1 and 2 scores, together with the percentages of major species in: (a-c) benthic assemblages 1, 2 and 3, respectively. The color-shaded intervals and abbreviations are the same as in Figure 2.

**Fig. S3.** Compilation of benthic  $\delta^{13}\text{C}$  records obtained from MD77-191 (1254 m) (Ma et al., 2020), MD77-176 (1325 m) (Ma et al., 2019), RC12-344 (2140 m, Naqvi et al., 1994), MD97-2120 (1210 m, Pahnke and Zahn, 2005), and Core 905 (1580 m, Jung et al., 2009). The color-shaded intervals and abbreviations are the same as in Figure 2.

**Fig. S4.** Compilation of benthic  $\delta^{13}\text{C}$ , PC 1 scores and  $\text{Cd}_w$  obtained from core MD77-176 (BoB). The color-shaded intervals and abbreviations are the same as in Figure 2.

**Table S1.** Sub-bottom depth, Cd/Ca values ( $\mu\text{mol/mol}$ ) of benthic foraminifera species from core MD77-191 (*Hoeglundina elegans*, *Cibicidoides pachyderma* and *Uvigerina peregrina*, *Globobulimina* spp.) and core MD77-176 (*Hoeglundina elegans*).

**Table S2.** Down-core depth and quantities of the major benthic foraminiferal species at core MD77-191.

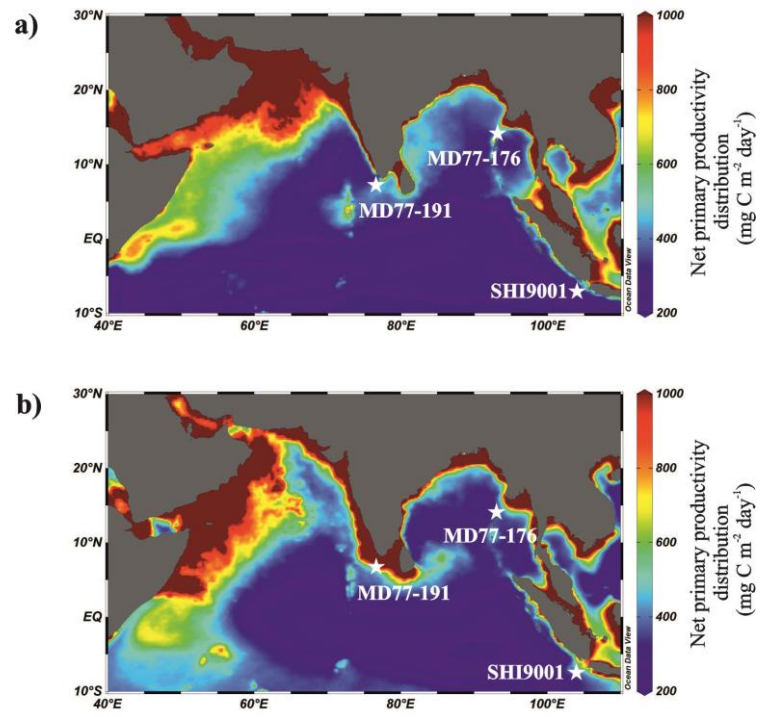

Fig. S1

(a)

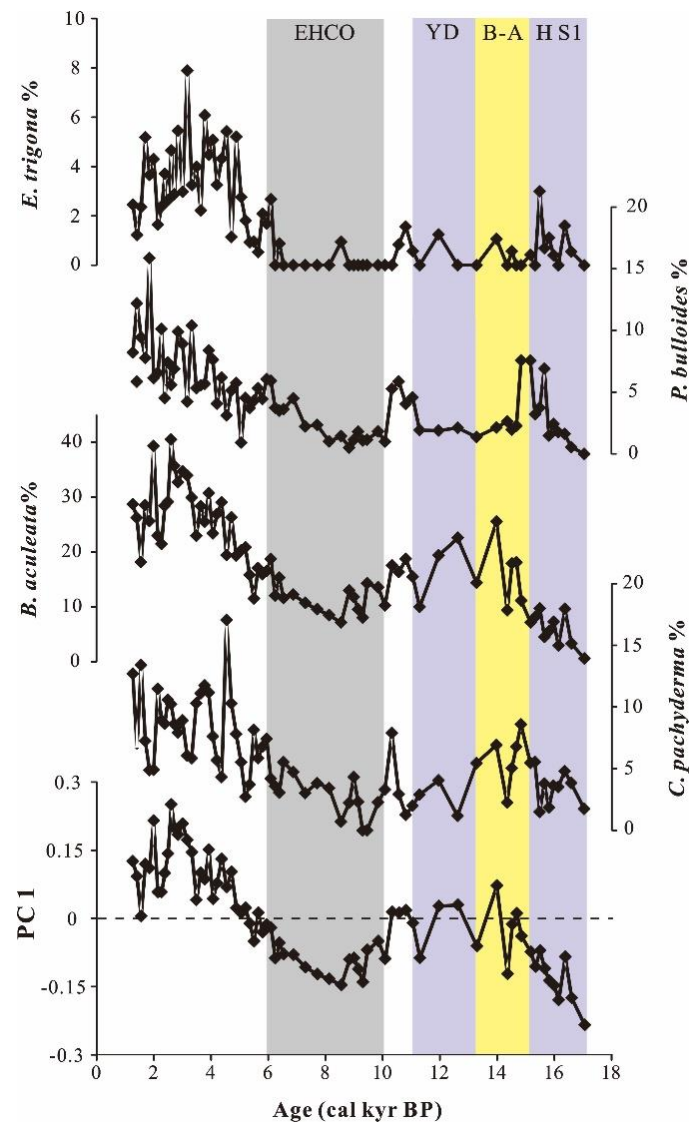

Fig. S2

(b)

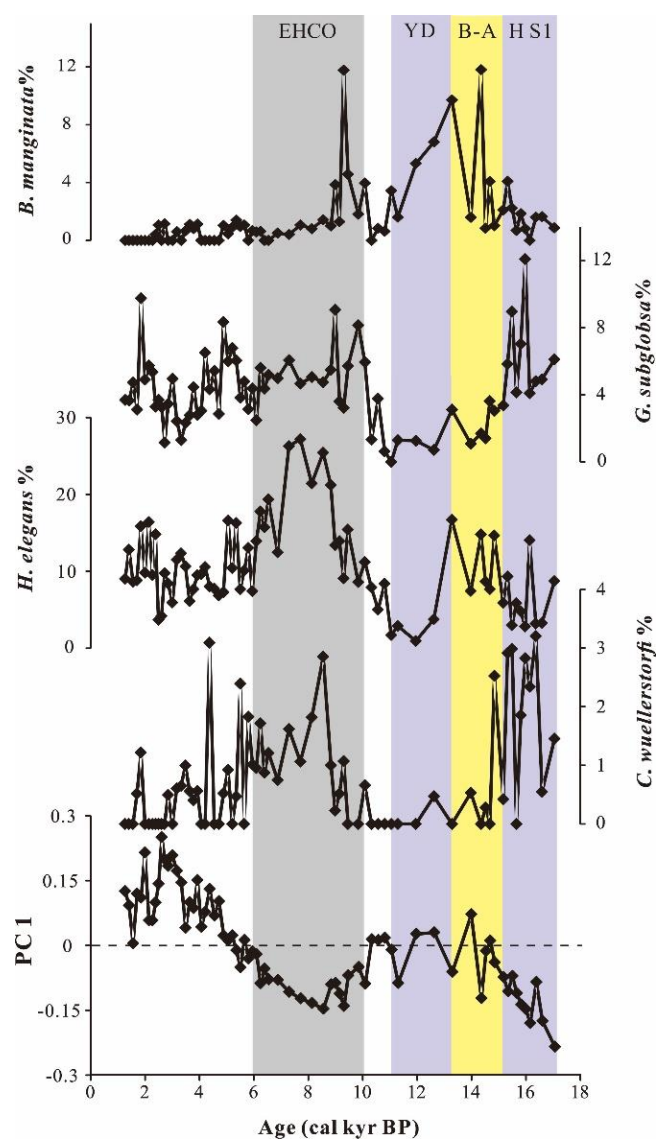

Fig. S2

(c)

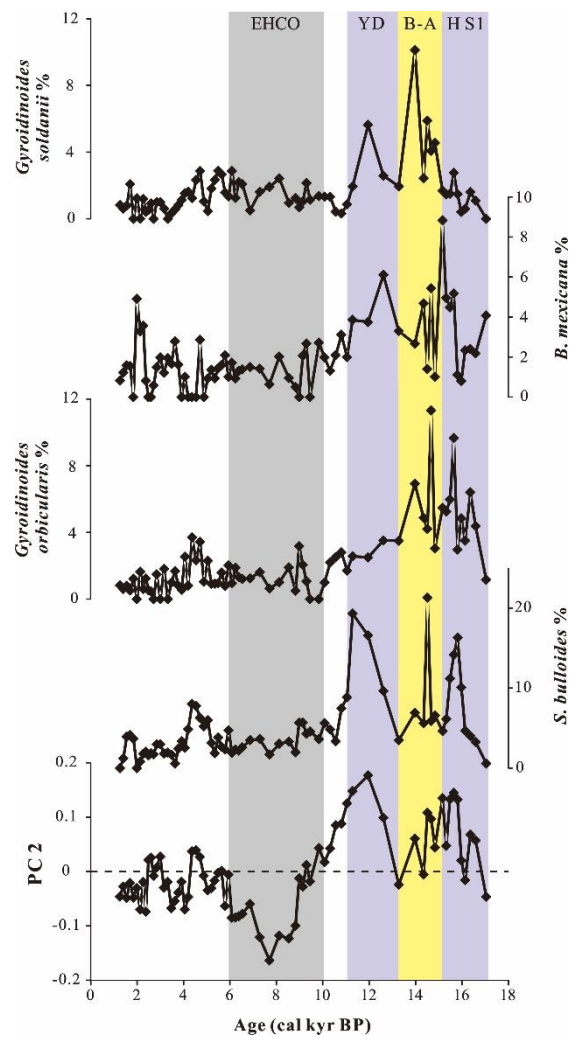

Fig. S2

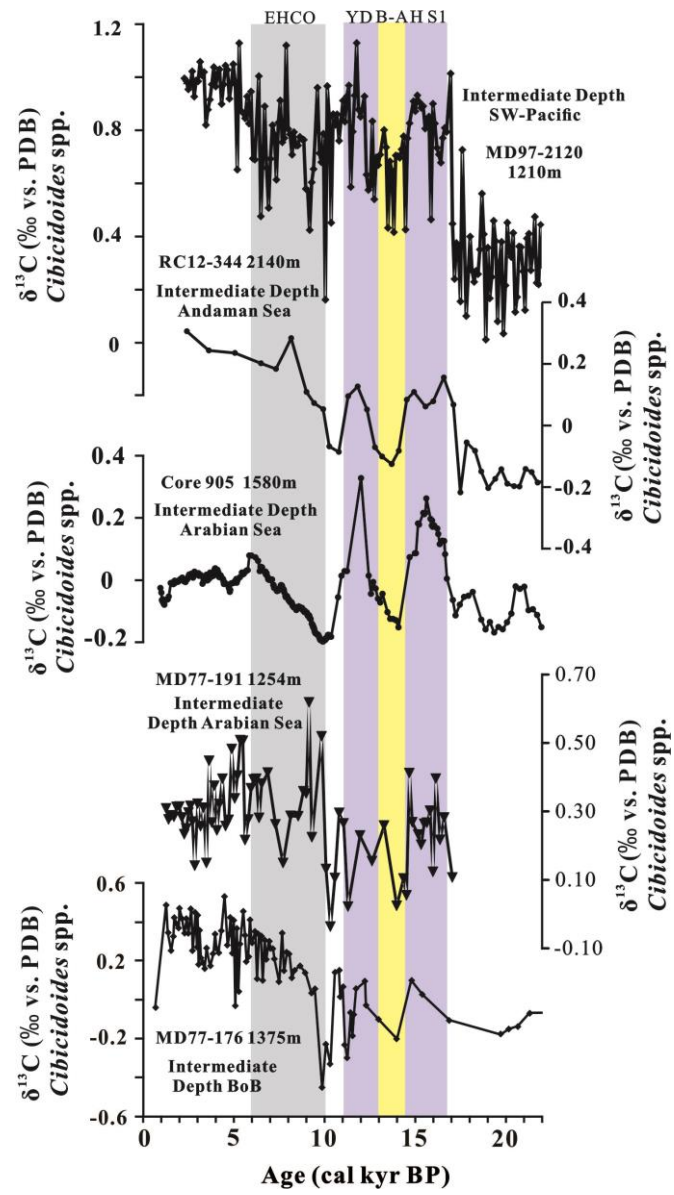

Fig. S3

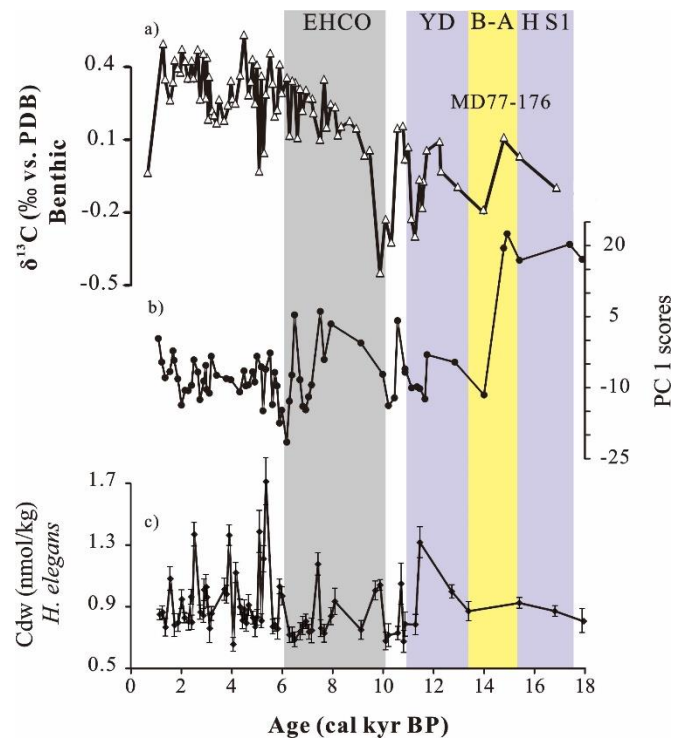

Fig. S4
