# Supplementary material for: Changes in productivity and intermediate circulation in the northern Indian Ocean since the last deglaciation: new insights from benthic foraminiferal Cd ∕ Ca records and benthic assemblage analyses
Source: Copernicus journal article supplement (doi:10.5194/cp-18-1757-2022), 2022-08-03
Supplement: Supplementary file 1 [file cp-18-1757-2022-supplement.zip › table S1- elemental ratios data from MD77-191 and MD77-176.xlsx]

## Sheet: MD77-191
depth	calendar age	benthic foraminifera spcies	Cd/Ca	STD		depth	calendar age	benthic foraminifera spcies	Cd/Ca	STD		depth	calendar age	benthic foraminifera spcies	Cd/Ca	STD		depth	calendar age	benthic foraminifera spcies	Cd/Ca	STD
(cm)	(kyr BP)		(µmol/mol)			(cm)	(kyr BP)		(µmol/mol)			(cm)	(kyr BP)		(µmol/mol)			(cm)	(kyr BP)		(µmol/mol)
20	1.41	Hoeglundina elegans	0.0802643	0.00785787		10	1.27	Cibicidoides pachyderma	0.0984797	0.00529821		10	1.27	Uvigerina peregrina	0.0960227	0.00601102		10	1.27	Globobulimina spp.	0.0463695	0.00332469
50	1.85	Hoeglundina elegans	0.0744456	0.00448163		30	1.56	Cibicidoides pachyderma	0.123179	0.00917684		30	1.56	Uvigerina peregrina	0.13602	0.0119562		20	1.41	Globobulimina spp.	0.0620442	0.00290367
60	1.99	Hoeglundina elegans	0.0893184	0.00798507		50	1.85	Cibicidoides pachyderma	0.117785	0.00843341		90	2.38	Uvigerina peregrina	0.134804	0.0117415		80	2.27	Globobulimina spp.	0.0737102	0.00238084
70	2.14	Hoeglundina elegans	0.159761	0.0127329		70	2.14	Cibicidoides pachyderma	0.114304	0.00556659		170	3.49	Uvigerina peregrina	0.120469	0.00504767		270	5.05	Globobulimina spp.	0.0666067	0.00393645
80	2.27	Hoeglundina elegans	0.117724	0.00842906		80	2.27	Cibicidoides pachyderma	0.141797	0.00645175		180	3.64	Uvigerina peregrina	0.120629	0.00850432		290	5.35	Globobulimina spp.	0.0684263	0.00429033
90	2.38	Hoeglundina elegans	0.314318	0.0220022		90	2.38	Cibicidoides pachyderma	0.129434	0.00786956		190	3.78	Uvigerina peregrina	0.0991908	0.0049397		320	5.8	Globobulimina spp.	0.0560798	0.00259089
130	2.85	Hoeglundina elegans	0.252709	0.0124333		100	2.49	Cibicidoides pachyderma	0.199703	0.00984536		210	4.07	Uvigerina peregrina	0.115603	0.00630036		330	5.94	Globobulimina spp.	0.0545071	0.00387545
150	3.17	Hoeglundina elegans	0.166879	0.0123991		110	2.61	Cibicidoides pachyderma	0.20637	0.0140331		270	5.05	Uvigerina peregrina	0.132393	0.0104194		340	6.09	Globobulimina spp.	0.0659937	0.0031743
160	3.33	Hoeglundina elegans	0.107075	0.00907993		120	2.72	Cibicidoides pachyderma	0.130367	0.0120459		300	5.5	Uvigerina peregrina	0.144182	0.00428222		350	6.24	Globobulimina spp.	0.0517882	0.0030814
170	3.49	Hoeglundina elegans	0.227131	0.015831		130	2.85	Cibicidoides pachyderma	0.174597	0.00979488		320	5.8	Uvigerina peregrina	0.11188	0.00464301		370	6.54	Globobulimina spp.	0.0644336	0.00507736
180	3.64	Hoeglundina elegans	0.105768	0.00430474		160	3.33	Cibicidoides pachyderma	0.109246	0.00866323		330	5.94	Uvigerina peregrina	0.103936	0.00362737		380	6.87	Globobulimina spp.	0.0555594	0.00413918
190	3.78	Hoeglundina elegans	0.141608	0.0128864		170	3.49	Cibicidoides pachyderma	0.175856	0.00928519		340	6.09	Uvigerina peregrina	0.105832	0.00611709		390	7.29	Globobulimina spp.	0.0904609	0.00426071
200	3.92	Hoeglundina elegans	0.17274	0.00832606		180	3.64	Cibicidoides pachyderma	0.116736	0.0079964		350	6.24	Uvigerina peregrina	0.118426	0.00412121		410	8.13	Globobulimina spp.	0.079852	0.00369715
210	4.07	Hoeglundina elegans	0.282008	0.0122673		190	3.78	Cibicidoides pachyderma	0.137067	0.00953986		370	6.54	Uvigerina peregrina	0.107464	0.00349258		450	9.15	Globobulimina spp.	0.0437197	0.0034626
220	4.21	Hoeglundina elegans	0.128025	0.0110613		200	3.92	Cibicidoides pachyderma	0.116885	0.00688453		380	6.87	Uvigerina peregrina	0.106157	0.00484076		480	9.62	Globobulimina spp.	0.041121	0.00376669
230	4.37	Hoeglundina elegans	0.276908	0.0139008		210	4.07	Cibicidoides pachyderma	0.139431	0.0143892		390	7.29	Uvigerina peregrina	0.120796	0.00462649		500	10.08	Globobulimina spp.	0.0404386	0.00272152
250	4.71	Hoeglundina elegans	0.215723	0.0101821		240	4.54	Cibicidoides pachyderma	0.141563	0.00989524		400	7.71	Uvigerina peregrina	0.0985259	0.00499526		530	10.81	Globobulimina spp.	0.058205	0.00399286
280	5.2	Hoeglundina elegans	0.0874769	0.00481123		250	4.71	Cibicidoides pachyderma	0.122479	0.00840209		410	8.13	Uvigerina peregrina	0.120743	0.00522816		580	13.29	Globobulimina spp.	0.0572741	0.00335053
290	5.35	Hoeglundina elegans	0.178973	0.0163581		260	4.88	Cibicidoides pachyderma	0.192827	0.0170845		420	8.55	Uvigerina peregrina	0.109772	0.00441283		600	14.36	Globobulimina spp.	0.0546574	0.00562424
300	5.5	Hoeglundina elegans	0.131573	0.00494713		270	5.05	Cibicidoides pachyderma	0.107166	0.00707296		440	8.99	Uvigerina peregrina	0.0948868	0.00480127		610	14.52	Globobulimina spp.	0.044921	0.00296928
308	5.62	Hoeglundina elegans	0.0918962	0.00529322		290	5.35	Cibicidoides pachyderma	0.116774	0.01636		450	9.15	Uvigerina peregrina	0.0843751	0.00433688		620	14.68	Globobulimina spp.	0.0381362	0.00228817
320	5.8	Hoeglundina elegans	0.103258	0.00605091		300	5.5	Cibicidoides pachyderma	0.104054	0.00733582		460	9.3	Uvigerina peregrina	0.0970496	0.00472631		630	14.84	Globobulimina spp.	0.0363572	0.00229051
330	5.94	Hoeglundina elegans	0.148375	0.0109352		308	5.62	Cibicidoides pachyderma	0.114864	0.00721343		500	10.08	Uvigerina peregrina	0.0995382	0.0048077		650	15.17	Globobulimina spp.	0.0576363	0.00308931
340	6.09	Hoeglundina elegans	0.0746467	0.00394881		320	5.8	Cibicidoides pachyderma	0.105305	0.0060866		530	10.81	Uvigerina peregrina	0.123534	0.0097839		660	15.33	Globobulimina spp.	0.0376018	0.0028239
350	6.24	Hoeglundina elegans	0.121502	0.0102548		330	5.94	Cibicidoides pachyderma	0.097965	0.00413412		540	11.05	Uvigerina peregrina	0.100526	0.00632307		680	15.65	Globobulimina spp.	0.0406744	0.00341665
360	6.39	Hoeglundina elegans	0.0730264	0.00278961		340	6.09	Cibicidoides pachyderma	0.104396	0.00517803		550	11.29	Uvigerina peregrina	0.0934861	0.00620748		690	15.82	Globobulimina spp.	0.0527824	0.00404314
370	6.54	Hoeglundina elegans	0.10146	0.0105519		350	6.24	Cibicidoides pachyderma	0.111117	0.00402244		560	11.96	Uvigerina peregrina	0.0909471	0.00897648
380	6.87	Hoeglundina elegans	0.0742309	0.00522586		360	6.39	Cibicidoides pachyderma	0.116892	0.00856821		610	14.52	Uvigerina peregrina	0.11655	0.00893935
390	7.29	Hoeglundina elegans	0.0951528	0.00949625		370	6.54	Cibicidoides pachyderma	0.089682	0.00417918		690	15.82	Uvigerina peregrina	0.101378	0.00605229
400	7.71	Hoeglundina elegans	0.0985963	0.0100174		380	6.87	Cibicidoides pachyderma	0.097644	0.00517513		700	15.98	Uvigerina peregrina	0.0856558	0.00409435
410	8.13	Hoeglundina elegans	0.0990465	0.0115686		390	7.29	Cibicidoides spp.	0.101081	0.00476091		710	16.14	Uvigerina peregrina	0.0829975	0.00598412
420	8.55	Hoeglundina elegans	0.0710482	0.00392186		400	7.71	Cibicidoides pachyderma	0.109462	0.0045208		730	16.6	Uvigerina peregrina	0.0731493	0.00404515
430	8.84	Hoeglundina elegans	0.0699135	0.00670471		410	8.13	Cibicidoides pachyderma	0.0949558	0.00319052		750	17.05	Uvigerina peregrina	0.0721585	0.00292964
440	8.99	Hoeglundina elegans	0.0927151	0.00457086		420	8.55	Cibicidoides spp.	0.120337	0.00435621
450	9.15	Hoeglundina elegans	0.116022	0.00792433		440	8.99	Cibicidoides spp.	0.083244	0.00406231
490	9.84	Hoeglundina elegans	0.0944215	0.00681723		450	9.15	Cibicidoides spp.	0.102709	0.00364617
500	10.08	Hoeglundina elegans	0.101544	0.00586923		480	9.62	Cibicidoides pachyderma	0.0735048	0.00428533
510	10.33	Hoeglundina elegans	0.0501213	0.002892		510	10.33	Cibicidoides pachyderma	0.0970593	0.00275648
520	10.57	Hoeglundina elegans	0.0520688	0.00435816		560	11.96	Cibicidoides spp.	0.082604	0.00522883
540	11.05	Hoeglundina elegans	0.0609414	0.00484484		580	13.29	Cibicidoides pachyderma	0.0798433	0.00653119
570	12.62	Hoeglundina elegans	0.080329	0.006836		610	14.52	Cibicidoides spp.	0.131508	0.00461595
580	13.29	Hoeglundina elegans	0.0904187	0.00577776		620	14.68	Cibicidoides spp.	0.109199	0.00831004
600	14.36	Hoeglundina elegans	0.0936752	0.00900219		655	15.25	Cibicidoides pachyderma	0.117261	0.0080324
620	14.68	Hoeglundina elegans	0.0677953	0.00478635		750	17.05	Cibicidoides pachyderma	0.0777739	0.00393536
635	14.92	Hoeglundina elegans	0.0587267	0.00482146
650	15.17	Hoeglundina elegans	0.067417	0.00542033
680	15.65	Hoeglundina elegans	0.0575048	0.00417485
690	15.82	Hoeglundina elegans	0.0600207	0.00444153
700	15.98	Hoeglundina elegans	0.0600216	0.00485575
750	17.05	Hoeglundina elegans	0.0851509	0.00865985

## Sheet: MD77-176
depth	calendar age	benthic foraminifera spcies	Cd/Ca	STD
(cm)	(kyr BP)		(µmol/mol)
12-13.5	1.13	Hoeglundina elegans	0.0849113	0.00342193
16	1.24	Hoeglundina elegans	0.0862783	0.00403783
20	1.36	Hoeglundina elegans	0.0766465	0.00568717
25-27	1.54	Hoeglundina elegans	0.108093	0.00758811
30-33	1.72	Hoeglundina elegans	0.0780555	0.00736844
35-38	1.86	Hoeglundina elegans	0.0796561	0.00578304
40-43	2	Hoeglundina elegans	0.0947367	0.00611999
45-46	2.12	Hoeglundina elegans	0.0827545	0.0033019
50-53	2.28	Hoeglundina elegans	0.0802069	0.00537386
55	2.38	Hoeglundina elegans	0.096309	0.00479619
55-58	2.41	Hoeglundina elegans	0.0798447	0.00459906
60	2.5	Hoeglundina elegans	0.136768	0.00764531
70	2.74	Hoeglundina elegans	0.0863979	0.00460501
75-76	2.87	Hoeglundina elegans	0.0841991	0.00441203
75-78	2.89	Hoeglundina elegans	0.100828	0.00701762
80	2.97	Hoeglundina elegans	0.102695	0.00791779
80-83	3	Hoeglundina elegans	0.096053	0.00647397
85-88	3.11	Hoeglundina elegans	0.0759299	0.00921789
90	3.19	Hoeglundina elegans	0.0855083	0.00456614
115	3.7	Hoeglundina elegans	0.101211	0.00713536
120	3.79	Hoeglundina elegans	0.0979543	0.00572053
125	3.89	Hoeglundina elegans	0.136148	0.00665761
134	4.05	Hoeglundina elegans	0.0655735	0.0045049
140	4.15	Hoeglundina elegans	0.111903	0.00649035
150	4.32	Hoeglundina elegans	0.08976	0.00495475
155	4.42	Hoeglundina elegans	0.0810387	0.00537286
160	4.49	Hoeglundina elegans	0.0880788	0.00635048
164	4.57	Hoeglundina elegans	0.0793463	0.0053162
170	4.66	Hoeglundina elegans	0.0909878	0.0067058
180	4.83	Hoeglundina elegans	0.0828818	0.00417724
185	4.92	Hoeglundina elegans	0.0768633	0.0063566
190	5	Hoeglundina elegans	0.0830723	0.00509233
195	5.09	Hoeglundina elegans	0.138547	0.0135638
200	5.17	Hoeglundina elegans	0.0808111	0.00446885
204	5.25	Hoeglundina elegans	0.120921	0.0084403
210	5.34	Hoeglundina elegans	0.171012	0.0152543
225	5.62	Hoeglundina elegans	0.0770366	0.00471464
230	5.71	Hoeglundina elegans	0.0782391	0.00434227
235	5.81	Hoeglundina elegans	0.0756444	0.00667184
240	5.89	Hoeglundina elegans	0.102929	0.00477588
245	5.99	Hoeglundina elegans	0.0968235	0.00588687
260	6.28	Hoeglundina elegans	0.0717569	0.00507321
265	6.39	Hoeglundina elegans	0.0718229	0.00484087
270	6.49	Hoeglundina elegans	0.0687756	0.00471801
280	6.71	Hoeglundina elegans	0.0739826	0.0055339
284-286	6.81	Hoeglundina elegans	0.0777655	0.00581686
290	6.93	Hoeglundina elegans	0.0804293	0.00467294
295	7.06	Hoeglundina elegans	0.0736554	0.00474341
300	7.16	Hoeglundina elegans	0.0745223	0.0080186
310	7.41	Hoeglundina elegans	0.117468	0.00718904
314	7.52	Hoeglundina elegans	0.0760035	0.00539625
320	7.66	Hoeglundina elegans	0.0727027	0.00574352
330	7.93	Hoeglundina elegans	0.0838521	0.00556778
335	8.08	Hoeglundina elegans	0.0933073	0.00853762
370	9.12	Hoeglundina elegans	0.0748911	0.00608865
390	9.69	Hoeglundina elegans	0.100425	0.00611589
395	9.88	Hoeglundina elegans	0.103944	0.00350291
404.5	10.1	Hoeglundina elegans	0.0677656	0.00571941
410	10.21	Hoeglundina elegans	0.0714918	0.0073994
425	10.58	Hoeglundina elegans	0.0729354	0.00431048
433	10.71	Hoeglundina elegans	0.104776	0.0132541
437	10.81	Hoeglundina elegans	0.0674731	0.00711167
440	10.87	Hoeglundina elegans	0.0786446	0.00775436
455	11.28	Hoeglundina elegans	0.0783723	0.00655193
465	11.46	Hoeglundina elegans	0.131539	0.00994434
515	12.72	Hoeglundina elegans	0.0997796	0.00426059
525	13.39	Hoeglundina elegans	0.0870617	0.00625974
564-567	15.4	Hoeglundina elegans	0.0924042	0.00343744
582-585	16.81	Hoeglundina elegans	0.0871405	0.00345076
595	17.89	Hoeglundina elegans	0.0808933	0.00774958
612.5	19.39	Hoeglundina elegans	0.0735174	0.00746937
615	19.5	Hoeglundina elegans	0.0765471	0.00753989
622.5	19.82	Hoeglundina elegans	0.0882727	0.00474907
625	19.93	Hoeglundina elegans	0.0654419	0.00252606
630	20.15	Hoeglundina elegans	0.0737699	0.00469177
635	20.38	Hoeglundina elegans	0.0838921	0.00546977
645.5	21.01	Hoeglundina elegans	0.0858466	0.00462713
660	21.96	Hoeglundina elegans	0.080381	0.00460583
