# Supplementary material for: Changes in productivity and intermediate circulation in the northern Indian Ocean since the last deglaciation: new insights from benthic foraminiferal Cd ∕ Ca records and benthic assemblage analyses
Source: Copernicus journal article supplement (doi:10.5194/cp-18-1757-2022), 2022-08-03
Supplement: Supplementary file 1 [file cp-18-1757-2022-supplement.zip › Table S2-major species quantities-MD77-191.xlsx]

## Sheet: numbers
Depth (cm)	Calendar age (kyr BP)	SUM	Bulimina aculeata	Bulimina manginata	Bulimina mexicana	Bulimina striata	Bolivina robusta	Bolivina spp.	Bolivinita quadrilatera	Brizalina pseudobeyrichi	Cibicidoides robertsonianus	Cibicidoides pachyderma	Cibicidoides wuellerstorfi	Cibicidoides bradyi	Cibicidoides spp.	Cassidulinoides bradyi	Cassidulina laevigata	Cassidulina spp.	Ceratobulimina jonesiana	Dentalina inflexa	Ehrenbergina trigona	Fursenkoina bradyi	Gyroidinoides orbicularis	Gyroidinoides soldanii	Gyroidina broeckhiana	Globocassidulina subglobosa	Globobulimina spp.	Gavelinopsis sp.	Hoeglundina elegans	Karreriella bradyi	Loxostomum sp.	Lenticulina spp.	Melonis barleeanum	Osangularia culter	Oridorsalis umbonatus	Pseudoglandulina glanduliniformis	Pullenia osloensis	Pullenia bulloides	Sphaeroidina bulloides	Spirosigmoilina tenuis	Spiroloculina spp.	Triloculinella obliquinodus	Uvigerina peregrina	Uvigerina proboscidea	U. schwageri	Uvigerina spp.	Valvulineria minuta	Prygo depressa	Pyrgo elongata
10	1.27	244	70		2		2					31									6		2	2	5	9	13		22						17			20					30					9
20	1.41	164	43		2						1	11									2		1	1	5	6	21		21						8			20	2				16					2
30	1.56	127	23		2						2	17									3		1	1	3	6	9		11						2			12	5				26					2	2
40	1.7	193	55		3		6	1				14	1								10		1	4	3	6	5		17				2	3	11			15	8				22					5
50	1.85	82	21					2				4	1								3		1		2	8			13						3			13	3				4					2
60	1.99	163	64		8		6					8									7			2	1	8	5		16					3	3		2	10					11					4
70	2.14	122	28		4							14									2		2		5	7	8		20			2		2	4			8	1				14	1
80	2.27	168	36		6		5					15									4		1	2	3	9	11		16					3	10			17	3				20		2			3
90	2.38	243	69	1	2		10				3	21									9		3	1	7	8	6		36			2		3	2			11	5				32	3		2		5
100	2.49	189	55	2			22				2	20									5		1	1	8	7	8		7			2		4				14	3				19	1				4
110	2.61	215	87				17	2			2	22									10		1	2	1	7	11		9			1		2	4		1	12	4				10					5
120	2.72	174	62	2	1		12				3	15									5				2	2	7		17			3		2	6	1		12	3				9			1
130	2.85	202	66		3	1	4		2		3	16	1								11		3	2	8	7	5		17		1	2	1		5			20	6				7			1
140	3.01	101	35		2		4				3	9					4				3			1	2	5	3		6			2	1	2	3			9	3				2					2
150	3.17	165	56	1	2	2	3	1			3	10	1								13		3	1	3	4	3		19			2		2	6		1	7	3				10			3		3
160	3.33	154	46		3		1				3	9	1					3			5				4	2	8		19		1	3		4	4	2		16	3				7			1
170	3.49	301	69	2	5	2	5			1	3	31	3								12		3	1	6	7	15		32			2		3	7		1	16	5				58					2
180	3.64	180	51	2	5		1				4	20	1				2				4		3	1	5	5	4	1	11		1		1	2	3	1		10	1				32	2				5
190	3.78	247	63	2	4		3				8	29	1								15		2	2	5	11	9		19			2		4	3			14	6				37	2				3
200	3.92	179	55	2			1	1			3	20	1								8		1	2	3	5	6		17					1	4	1	1	15	6				14
210	4.07	197	46		2		1				5	15					1				10		5	3	5	6	6		19			1		3	3			15	5				40
220	4.21	123	33								3	7									4		1	2	7	8	2		13				1	1	1			5	6				17					5
230	4.37	162	47				1			1	3	7	5					2	1		7		6	2	5	7	4		13		1	1	1	3	6		1	10	13				6					5
240	4.54	129	25				1				1	22									7		3	3	8	7	4		10					4	7			4	10				6			1
250	4.71	175	46		5	2	5				3	18					2				2		6	5	7	5	6		12			1	1	2	3			9	11				15					5
260	4.88	192	37	2		1	5				6	15	1							1	10		2	2		16	8		14			3	1	1	8		1	11	10				27	5
270	5.05	217	44	1	2	3	1	2				12	2								6		5	1	7	13	15		36				3	1	11	1		2	13				23	2				5
280	5.2	221	46	2	3		4				13	6									4		2	4	10	15	9		23		1	2		5	12	1		10	7				29	2				3
290	5.35	215	34	3	2		3	2		1	14	8	1			6					2		2	5	6	13	21		35	1		2		6	12	2		8	4				13	1		1		2	1
300	5.5	209	24	2	3	2	3				15	17	5			2		1			2		2	6	3	8	10		16		1	2		7	8	3		9	8				30	3		2		5
308	5.65	188	32	2	3	1	3				12	11				2					1		3	5	7	9	10		19	1	1	2		9	14			10	5				16			1
320	5.8	383	61		8			1		2	17	26	7			5					8		3	6	12	12	23		50		1	2		10	15			17	9				68	4				2	1
330	5.94	297	49	2	3		4	1			7	22	3			3					5		6	4	19	13	23		22					6	8			18	14				49	3
340	6.09	524	98	3	9	5	4				7	22	5			3					14		5	15	22	13	30		73					4	10			31	10		1		111	5		3		4
350	6.24	642	77	4	6	2	8				14	23	11		3	11							12	8	18	36	42		114	5	3	6	2	9	11		2	24	15				122	8		3		8
360	6.39	229	35		3		5				7	7	2			7			1		2		3	5	9	10	11		36		2			5	3	1		8	5			1	44	4	3			3
370	6.54	579	67		8		3	2		2	18	32	7			11							7	12	25	30	42		112		1			14	8		1	21	15		2	1	90	6	3	2		10	1
380	6.87	401	49	2	6		4				13	19	3			4							5	2	12	20	23		50	1		2	3	15	8			18	14				83	5	3			14
390	7.29	495	53	2	7	3	3	7			9	15	8			5							8	8	18	30	24		130		2		2	9	6	2	1	11	18				82	5	4				3
400	7.71	471	45	5	3						18	18	5			6			2				3	9	13	22	13		128			3	3	9	3	1		11	8		1	2	97	3	4			8	2
410	8.13	495	42	4	10		2	1			15	17	9			12							5	12	15	25	19		106	2	3			15	6	2		5	15			1	105	10				5
420	8.55	421	30	6	4		1				6	3	12	10					3		4		8	4	10	20	13		107			2		9	10	3		6	14			2	77	10		4		2	2
430	8.84	401	52	4	2		3			2	11	9	4			4							2	5	12	22	15		85					5	5	2	5	2	8			5	66	6	3			3	8
440	8.99	441	52	17		16	4				7	19	1										14	3	10	40	21		59		1			6	3			5	25	7			60	11		9		6	5
450	9.15	388	37	5	8	7	3	2	1		5	9	2		10							1	8	4		14	30		54					2	34			7	22				68			27		8	5
460	9.3	187	15	22	5		3	1			3		2										2	4	3	6	15		17	1	3							2	8		2	3	34	10	3	4			3
470	9.46	175	25	8		3	1				5				8					3				2	5	10	14		27					2	3	2		2	8				21	3	3				4
490	9.84	221	30	4	6		23	5			6	5												3	8	18	18		19					6				4	8		1	6	23	3	2				3
500	10.08	303	31	12	6	2	22				3	10	2		5								3	4	11	18	24		34				1	3	5		2	3	17			4	42	8	3			1	4
510	10.33	228	40		3		22				3	18				3			1				5	3	11	3	13		18					4	6			12	11			2	22			1		2	6
520	10.57	239	39	2	5	3	30		3		6	7				4			2		2		6	1	22	9	24		12					9				14	8				16						1
530	10.81	321	60	2	10	5	36	2	2		10	4									5		9	1	18	2	40		27				2	10		2		13	24				20	3				3	2
540	11.05	350	54	12	7	4	46				2	7								1	2		6	3	35		35		6				2	5	3		2	16	31				32	12				1	3
550	11.29	311	31	5	12	14	2	2			5	9			8	2							8	6	16	4	24		9	1			3	3	3			6	60			2	30	6		6			8
560	11.96	320	62	17	12	8					2	13			4	2	6		2		4		8	18	6	4	27		3	1		6	2	18	5			6	53				6
570	12.62	426	96	29	26	10	6				7	5	2			1							15	11	16	3	37		16		1			15	8		1	9	41			4	36						6
580	13.29	515	74	50	17	6		6				28			5	3							18	10	5	16	43		86		2			4	6			7	18		3		65	5	8	4			6
590	13.98	188	48	3	5			3	1			13	1			1					2		13	19		2	13		14						4			4	13				13					2	12
600	14.36	534	50	63	25		2				2	12			22								26	13	4	9	44		79					3	6			14	30			4	88	9				1	4
610	14.52	357	64	3	5	2	2	2			3	18	1		6						2		15	21	4	5	24		31						7			7	76			2	30	2				2	6
620	14.68	221	40	9	12		5				2	15				1			2				25	9		8	26		17		2			2	4		2	5	13				10
630	14.84	198	22	2	2	2	2				6	17	5		3	1			2				6	9		6	23		29						7			15	13		1		8		2			3	3
650	15.17	238	17	5	21	17	1					13	1						4		1		13	4		8	38		14	1				1	5		2	18	11			3	6	3				8	8
660	15.33	343	28	14	17	7	3				3	19	10		17	2			1				18	5		20	36		32						5		3	11	21			2	43	5				2	7
670	15.49	134	13	3	6		7				1	2	4			5			2		4		8	2		12	11		4					1	2			5	15				9	5				2	3
680	15.65	290	13	2	15	6	16				1	11				10					2		28	8	3	12	27		17						5			20	41			2	21	4				5
690	15.82	270	15	5	3		14				1	5	5		15						3		8	4		19	42		13					4	5			4	44				34			7		2
700	15.98	248	18	2	2					5		9	7								1		12	1		30	11		7					1	11			6	25				60			9			7
710	16.14	171	5		4		2			2		6	4			3							6	1	1	7	4		24				1	2	4		2	3	8			1	29	2				2	18
720	16.37	125	12	2	3							6	4			2			2		2		8	2		6	7		4			2			8		3	2	5		2	1	15				3		12
730	16.6	183	6	3	4			3		1		7	1								1	1	8	2		9	9		6						4			1	6				31			4		6	17
750	17.05	344	2	3	14	4		2			1	6	5		27								4			21	14		30						3				2				90	30		36		3	13
[truncated: 8 more columns]
